# Supplementary material for: Analysing increasing trends of Guillain-Barré Syndrome (GBS) and dengue cases in Hong Kong using meteorological data
Source: PLOS journal article supplement (doi:10.1371/journal.pone.0187830), 2017-12-04
Supplement: S1 (10.1371/journal.pone.0187830.s001) [file journal.pone.0187830.s001]

# <sup>1</sup> **Supplementary Materials**

## <sup>2</sup> **Results of Poisson Regression**

<sup>3</sup> Poisson regression coefficients,  $\beta$ , of the three Poisson Regression models are summarized  
<sup>4</sup> in Table S1.

Table S1: Results of Poisson regression,  $\beta$ , estimated from three Poisson Regression models. Here, \* denotes  $p$ -value  $\in (0.01, 0.1]$ , \*\* denotes  $p$ -value  $\in (0.001, 0.01]$  and \*\*\* denotes  $p$ -value  $< 0.001$ .

| <b>Dengue</b> | Lag( $\tau$ ) | Coeff. of MEI( $\beta_1$ )    | 95% CI            | $R^2$     | $p$ -value | signf. |
|---------------|---------------|-------------------------------|-------------------|-----------|------------|--------|
|               | 0             | 0.1837                        | [0.1047, 0.2627]  | 0.05474   | 5.147e-06  | ***    |
|               | 1             | 0.2225                        | [0.1424, 0.3025]  | 0.07863   | 5.133e-08  | ***    |
|               | 2             | 0.2820                        | [0.2003, 0.3638]  | 0.12073   | 1.385e-11  | ***    |
|               | 3             | 0.3417                        | [0.2580, 0.4253]  | 0.16859   | 1.213e-15  | ***    |
|               | 4             | 0.3555                        | [0.2683, 0.4428]  | 0.17237   | 1.376e-15  | ***    |
|               | 5             | 0.3507                        | [0.2602, 0.4412]  | 0.16035   | 3.137e-14  | ***    |
|               | 6             | 0.3065                        | [0.2146, 0.3984]  | 0.12191   | 6.203e-11  | ***    |
|               | 7             | 0.2780                        | [0.1842, 0.3718]  | 0.09853   | 6.216e-09  | ***    |
|               | 8             | 0.2519                        | [0.1575, 0.3463]  | 0.08021   | 1.708e-07  | ***    |
|               | 9             | 0.2724                        | [0.1774, 0.3674]  | 0.09281   | 1.923e-08  | ***    |
|               | 10            | 0.2284                        | [0.1344, 0.3224]  | 0.06753   | 1.921e-06  | ***    |
|               | 11            | 0.1874                        | [0.0943, 0.2805]  | 0.04665   | 7.927e-05  | ***    |
| <b>GBS</b>    | Lag( $\tau$ ) | Coeff. of MEI( $\beta_2$ )    | 95% CI            | $R^2$     | $p$ -value | signf. |
|               | 0             | 0.0438                        | [-0.0361, 0.1238] | 9.709e-03 | 0.2827     |        |
|               | 1             | -0.0041                       | [-0.0852, 0.0770] | 8.341e-05 | 0.9208     |        |
|               | 2             | -0.0151                       | [-0.0978, 0.0675] | 1.088e-03 | 0.7200     |        |
|               | 3             | -0.0172                       | [-0.1015, 0.0670] | 1.376e-03 | 0.6884     |        |
|               | 4             | -0.0030                       | [-0.0894, 0.0835] | 3.898e-05 | 0.9462     |        |
|               | 5             | 0.0139                        | [-0.0750, 0.1028] | 8.245e-04 | 0.7595     |        |
|               | 6             | 0.0206                        | [-0.0700, 0.1112] | 1.750e-03 | 0.6561     |        |
|               | 7             | 0.0469                        | [-0.0459, 0.1396] | 8.661e-03 | 0.3223     |        |
|               | 8             | 0.0848                        | [-0.0096, 0.1792] | 2.743e-02 | 0.0785     | *      |
|               | 9             | 0.1137                        | [0.0185, 0.2088]  | 4.929e-02 | 0.0192     | *      |
|               | 10            | 0.1139                        | [0.0185, 0.2092]  | 4.930e-02 | 0.0192     | *      |
|               | 11            | 0.0738                        | [-0.0207, 0.1684] | 2.124e-02 | 0.1261     |        |
| <b>GBS</b>    | Lag( $\tau$ ) | Coeff. of Dengue( $\beta_3$ ) | 95% CI            | $R^2$     | $p$ -value | signf. |
|               | 0             | -0.0146                       | [-0.0306, 0.0014] | 0.0279    | 7.436e-02  | *      |
|               | 1             | -0.0067                       | [-0.0222, 0.0088] | 0.0062    | 3.968e-01  |        |
|               | 2             | 0.0103                        | [-0.0041, 0.0247] | 0.0160    | 1.621e-01  |        |
|               | 3             | 0.0160                        | [0.0018, 0.0302]  | 0.0393    | 2.737e-02  | *      |
|               | 4             | 0.0134                        | [-0.0013, 0.0280] | 0.0263    | 7.309e-02  | *      |
|               | 5             | 0.0280                        | [0.0141, 0.0419]  | 0.1211    | 8.017e-05  | ***    |
|               | 6             | 0.0327                        | [0.0191, 0.0463]  | 0.1682    | 2.479e-06  | ***    |
|               | 7             | 0.0289                        | [0.0149, 0.0428]  | 0.12706   | 5.191e-05  | ***    |
|               | 8             | 0.0098                        | [-0.0055, 0.0252] | 0.0134    | 2.104e-01  |        |
|               | 9             | 0.0140                        | [-0.0011, 0.0291] | 0.0282    | 6.882e-02  | *      |
|               | 10            | -0.0054                       | [-0.0221, 0.0112] | 0.0037    | 5.228e-01  |        |
|               | 11            | 0.0024                        | [-0.0137, 0.0184] | 0.0008    | 7.718e-01  |        |
